# Supplementary material for: Performance and limits of 2.0 eV bandgap CuInGaS2 solar absorber integrated with CdS buffer on F:SnO2 substrate for multijunction photovoltaic and photoelectrochemical water splitting devices
Source: Royal Society of Chemistry journal article supplement (doi:10.1039/d1ma00570g), 2021-01-01
Supplement: d1ma00570g1.pdf [file d1ma00570g1.pdf]

## Electronic Supplementary Information

### **Performance and Limits of 2.0 eV Bandgap CuInGaS<sub>2</sub> Solar Absorber Integrated with CdS Buffer on F:SnO<sub>2</sub> Substrate for Multijunction Photovoltaic and Photoelectrochemical Water Splitting Devices**

*Nicolas Gaillard,<sup>1,\*</sup> Wilman Septina,<sup>1</sup> Joel Varley,<sup>2</sup> Tadashi Ogitsu,<sup>2</sup> Kenta K. Ohtaki,<sup>3</sup> Hope A. Ishii,<sup>3</sup> John P. Bradley,<sup>3</sup> Christopher Muzzillo,<sup>4</sup> Kai Zhu,<sup>4</sup> Finn Babbe<sup>5</sup> and Jason Cooper.<sup>5</sup>*

<sup>1</sup> Hawaii Natural Energy Institute, University of Hawaii, Honolulu, Hawaii 96822, USA

<sup>2</sup> Lawrence Livermore National Laboratory, Livermore, California 94550, USA

<sup>3</sup> Hawaii Institute of Geophysics & Planetology, University of Hawaii, Honolulu, Hawaii 96822,  
USA

<sup>4</sup> National Renewable Energy Laboratory, Golden, Colorado 80401, USA

<sup>5</sup> Chemical Sciences Division, Lawrence Berkeley National Laboratory, Berkeley, CA 94720,  
USA

\* Corresponding author: [ngaillard@hawaii.edu](mailto:ngaillard@hawaii.edu)

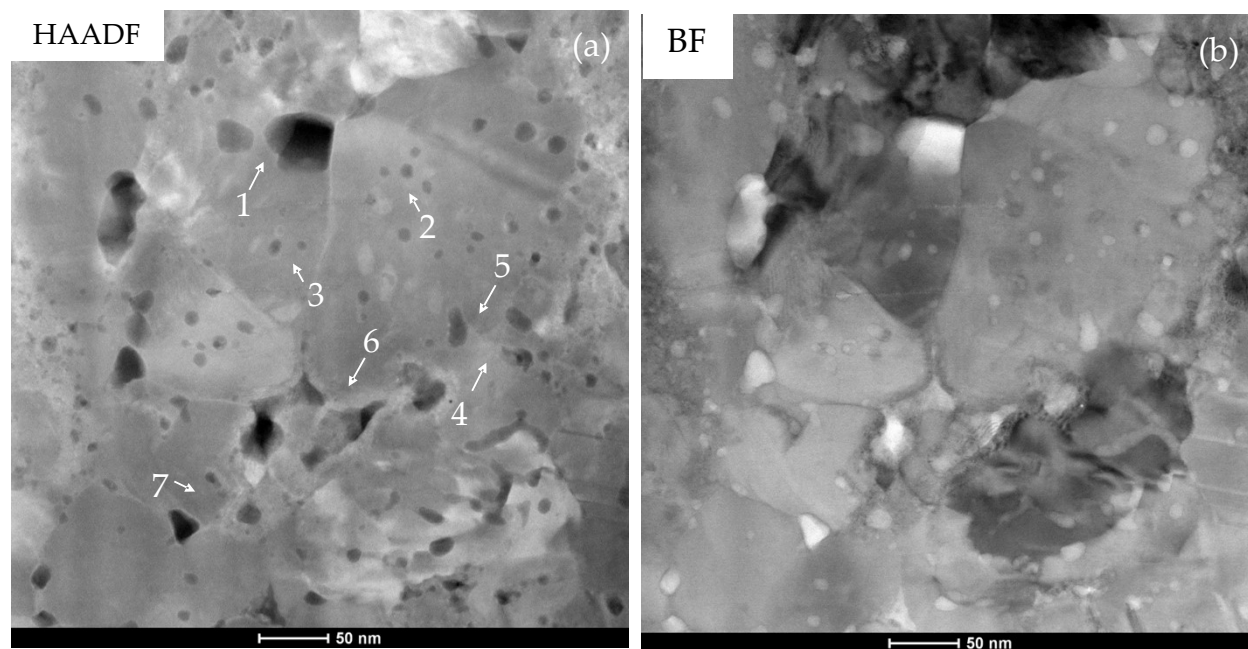

Figure S1. (a) Dark field and (b) corresponding bright field TEM micrographs of the bulk of a CIGS solar cell.

Table S1. Elemental composition measured by TEM/EDX point analysis in Figure S1.

| Atomic %    | Spot #1     | Spot #2     | Spot #3     | Spot #4     | Spot #5     | Spot #6     | Spot #7     | Average     |
|-------------|-------------|-------------|-------------|-------------|-------------|-------------|-------------|-------------|
| O(K) (%)    | 31.22       | 42.13       | 38.96       | 33.15       | 36.81       | 40.79       | 34.93       | 36.9        |
| S(K) (%)    | 32.62       | 27.45       | 28.35       | 29.65       | 29.64       | 28.42       | 31.26       | 29.6        |
| Cu(K) (%)   | 17.02       | 12.82       | 13.63       | 15.84       | 14.86       | 12.61       | 15.09       | 14.6        |
| Ga(K) (%)   | 13.03       | 11.19       | 12.24       | 12.4        | 12          | 12.08       | 12.34       | 12.2        |
| Se(K) (%)   | 1.55        | 2.04        | 2.06        | 1.53        | 1.48        | 1.94        | 1.48        | 1.7         |
| Cd(K) (%)   | 0.27        | 0.59        | 0.55        | 0.6         | 0.68        | 0.58        | 0.63        | 0.6         |
| In(K) (%)   | 4.26        | 3.75        | 4.17        | 6.79        | 4.5         | 3.56        | 4.23        | 4.5         |
| <b>CGI</b>  | <b>0.98</b> | <b>0.86</b> | <b>0.83</b> | <b>0.83</b> | <b>0.90</b> | <b>0.81</b> | <b>0.91</b> | <b>0.87</b> |
| <b>GGI</b>  | <b>0.75</b> | <b>0.75</b> | <b>0.75</b> | <b>0.65</b> | <b>0.73</b> | <b>0.77</b> | <b>0.74</b> | <b>0.73</b> |
| <b>SSSe</b> | <b>0.95</b> | <b>0.93</b> | <b>0.93</b> | <b>0.95</b> | <b>0.95</b> | <b>0.94</b> | <b>0.95</b> | <b>0.94</b> |

### **Room temperature PL data and calibration process:**

Photoluminescence spectra were collected at room under various excitation densities using a 405 nm CW laser. An exemplary spectrum is depicted in Figure S6(a) showing a broad asymmetric peak centered around 1.4 eV likely corresponding to a defect-band transition. To determine the external radiative efficiency a reference sample (perylene in ethanol) with a known ERE close to 100 % is used. From the ratio of the excitation density used ( $EX_{CIGS}$  and  $EX_{PL}$ ) and the ratio of the integrated PL intensity ( $EX_{CIGS}$ ,  $EX_{PL}$ ) as well as the absorptivity of the reference at 405 nm, the ERE of the CIGS can be calculated, giving a value around 0.00012 %.

$$ERE_{CIGS} = \frac{EX_{CIGS}}{EX_{Ref}} * \frac{PL_{CIGS}}{PL_{ref}} * abs * ERE_{Ref}$$

This ERE corresponds to a  $qFLS_{loss}$  of 0.34 eV [ $qFLS_{loss} = kT/q * \ln(ERE)$ ]. Using the maximal achievable  $V_{OC,SQ}$  (1.672 eV) for an  $E_g$  of 1.98 eV the  $qFLs$  can be determined to be 1.332 eV (high excitation). In the next step the area of the laser spot and total laser power is measured to determine the photon flux density at the sample spot. From this the equivalent number of suns is determined to be ~95 suns by dividing the incoming photon flux by the photon flux absorbed under AM1.5 illumination by an 2 eV bandgap assuming unity absorption above  $E_g$ . The  $qFLs$  increases with excitation density dependent on the diode factor (as the  $V_{oc}$  also does). To extract the optical diode factor, PL is measured over two orders of magnitude and the integrated PL fitted linearly in a log-log plot as shown in Figure S6(b). The slope gives the optical diode factor of 1.38. In a last step the  $qFLs$  value at 95 suns is scaled down by 162 meV corresponding to  $1.38 * kT/q * \ln(95)$ , giving the final  $qFLs$  value at 1 sun of  $(1.17 \pm 0.05)$  eV.

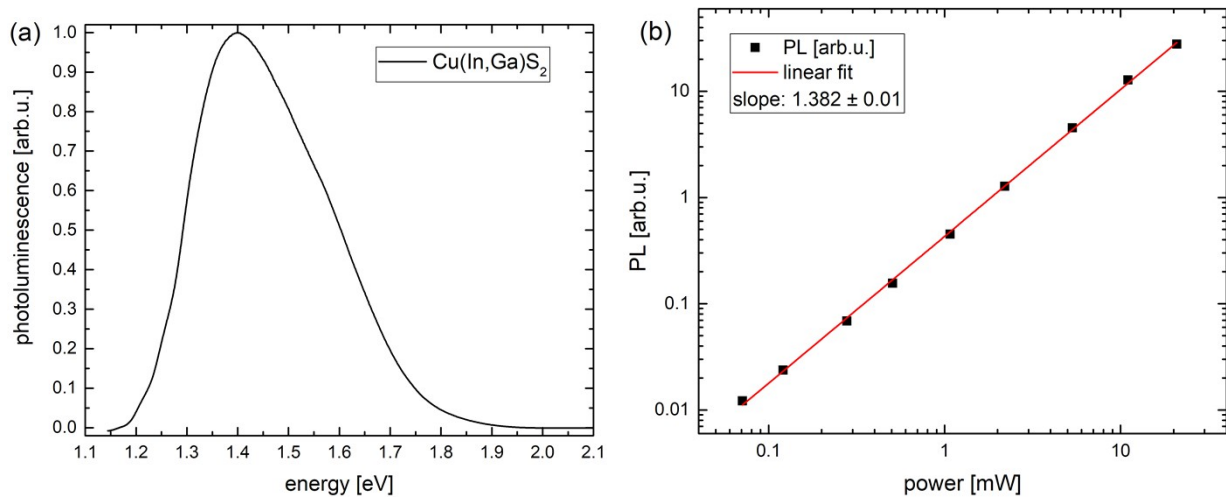

**Figure S2: (a) Photoluminescence spectrum of a Cu(In,Ga)S<sub>2</sub> absorber layer measured at room temperature with 405 nm excitation. (b) Log-log plot of the integrated PL intensity measured over 2.5 decades of excitation. The slope of the linear fit gives the optical diode factor.**

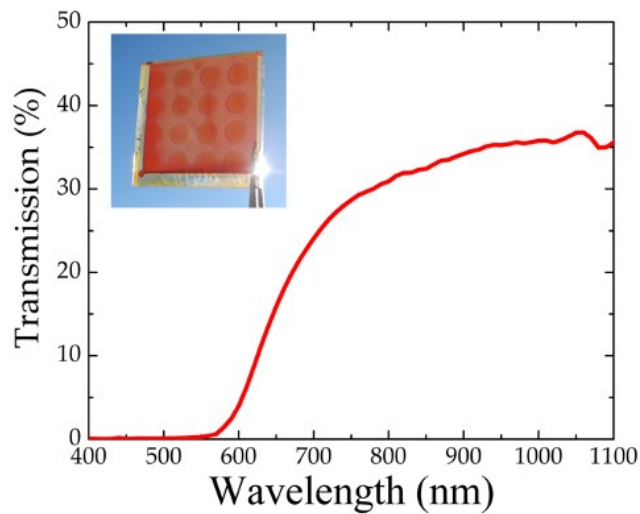

**Figure S3. Optical transmission of a fully integrated 2.0 eV CIGS solar cell. (Insert) Optical image of the 1”×1” FTO substrate with nine functional 0.12 cm<sup>2</sup> CIGS solar cells, as defined by ITO pads sputtered through a shadow mask. Cells from the bottom row and left column were shunted due to direct contact of the ITO pads edge with the FTO substrate.**

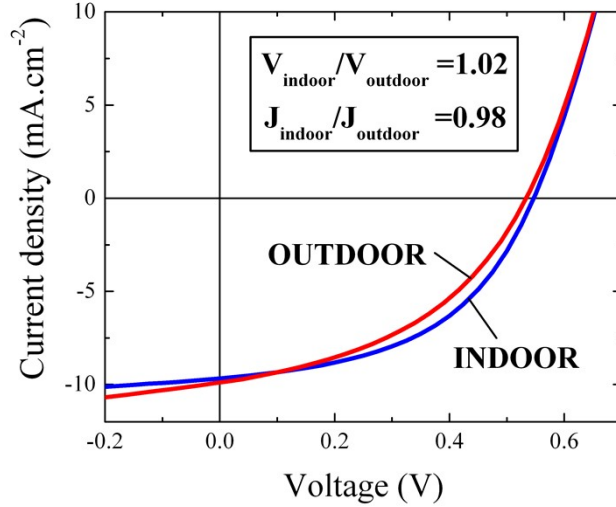

**Figure S4. Current vs. voltage characteristics of a representative 2.0 eV CIGS solar cell (PCE = 2.4%) integrated on FTO and measured under simulated (“indoor”) and outdoor AM1.5<sub>G</sub> illumination. For indoor testing, the J-V characteristic was measured with illumination produced by a 1000W Xe-arc bulb tuned such that its irradiance corresponds to that of AM1.5<sub>G</sub> within the absorption range of a 2.0 eV material (375 W/m<sup>2</sup>). For outdoor testing, the J-V characteristic was measured when an NREL-calibrated silicon photodiode produced its AM1.5<sub>G</sub>-calibrated short-circuit current.**

**Table S2. Temperature-dependence of 1.2eV CIGSe/Mo solar cell electrical properties**

| T<br>(K) | J <sub>SC</sub><br>(mA/cm <sup>2</sup> ) | V <sub>OC</sub><br>(mV) | FF<br>(%) | PCE<br>(%) | R <sub>S</sub><br>(Ω.cm <sup>2</sup> ) | R <sub>SH</sub><br>(Ω.cm <sup>2</sup> ) | J <sub>0,dark</sub><br>(mA/cm <sup>2</sup> ) | A <sub>dark</sub> |
|----------|------------------------------------------|-------------------------|-----------|------------|----------------------------------------|-----------------------------------------|----------------------------------------------|-------------------|
| 300      | 32.9                                     | 674                     | 67        | 14.8       | 1.79                                   | 1020                                    | 5.4E-07                                      | 1.5               |
| 250      | 33.3                                     | 773                     | 69        | 17.8       | 1.86                                   | 971                                     | 2.3E-09                                      | 1.6               |
| 200      | 33.2                                     | 855                     | 71        | 20.1       | 1.81                                   | 947                                     | 3.8E-09                                      | 1.9               |
| 150      | 32.9                                     | 931                     | 69        | 21.1       | 1.94                                   | 842                                     | 6.7E-12                                      | 2.1               |

**Table S3. Temperature-dependence of 2.0eV CIGS/FTO solar cell electrical properties**

| T<br>(K) | J <sub>SC</sub><br>(mA/cm <sup>2</sup> ) | V <sub>OC</sub><br>(mV) | FF<br>(%) | PCE<br>(%) | R <sub>S</sub><br>(Ω.cm <sup>2</sup> ) | R <sub>SH</sub><br>(Ω.cm <sup>2</sup> ) | J <sub>0,dark</sub><br>(mA/cm <sup>2</sup> ) | A <sub>dark</sub> |
|----------|------------------------------------------|-------------------------|-----------|------------|----------------------------------------|-----------------------------------------|----------------------------------------------|-------------------|
| 300      | 9.37                                     | 495                     | 38        | 1.78       | 10.57                                  | 202                                     | 2.0E-03                                      | 2.3               |
| 250      | 9.10                                     | 595                     | 38        | 2.03       | 10.76                                  | 249                                     | 7.6E-04                                      | 2.9               |
| 200      | 7.52                                     | 640                     | 35        | 1.69       | 19.43                                  | 224                                     | 1.7E-05                                      | 2.5               |
| 150      | 4.49                                     | 602                     | 33        | 0.89       | 41.43                                  | 230                                     | 9.1E-07                                      | 2.4               |

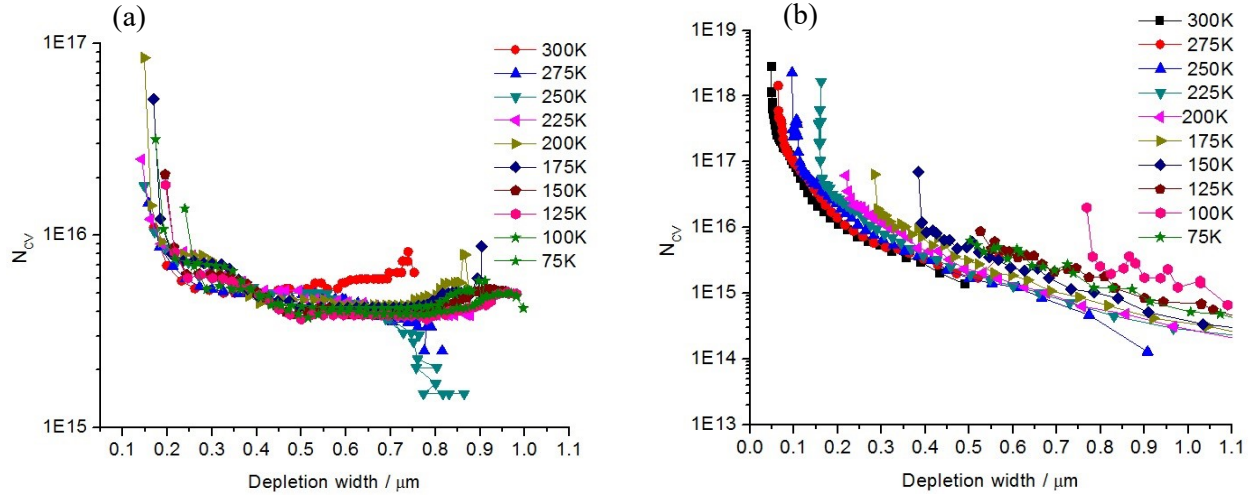

**Figure S5. Comparison of the depth profiles of apparent doping density deduced from C-V measurements of (a) 1.13 eV CIGSe and (b) 2.0 eV CIGS solar cells.**

**Table S4. Apparent doping density ( $N_{CV}$ ) and depletion width calculated at 0V from the C-V measurements presented in Figure 8.**

| T   | 1.13 eV CuInGaSe <sub>2</sub> |                       | 2.0 eV CuInGaS <sub>2</sub> |                       |
|-----|-------------------------------|-----------------------|-----------------------------|-----------------------|
|     | x at 0V ( $\mu\text{m}$ )     | N <sub>cv</sub> at 0V | x at 0V ( $\mu\text{m}$ )   | N <sub>cv</sub> at 0V |
| 300 | 0.39                          | 5.19E+15              | 0.06                        | 3.67E+17              |
| 275 | 0.4                           | 4.95E+15              | 0.08                        | 2.23E+17              |
| 250 | 0.39                          | 5.34E+15              | 0.11                        | 1.40E+17              |
| 225 | 0.39                          | 5.16E+15              | 0.16                        | 1.05E+17              |
| 200 | 0.4                           | 4.43E+15              | 0.22                        | 6.20E+16              |
| 175 | 0.44                          | 4.57E+15              | 0.29                        | 1.92E+16              |
| 150 | 0.51                          | 3.99E+15              | 0.39                        | 1.19E+16              |
| 125 | 0.58                          | 4.01E+15              | 0.55                        | 4.72E+15              |
| 100 | 0.52                          | 3.87E+15              | 0.78                        | 3.61E+15              |
| 75  | 0.45                          | 4.32E+15              | -                           | -                     |

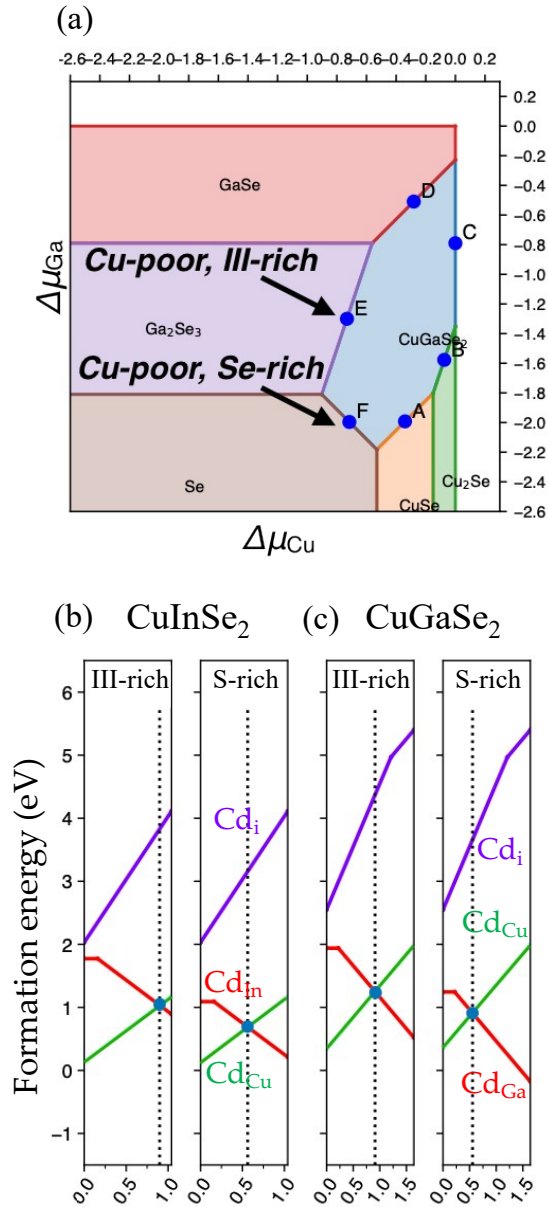

Figure S6. (a) Representative chalcopyrite phase diagram for  $\text{CuGaSe}_2$ , shown as a function of the Ga and Cu chemical potentials ( $\mu$ ). The calculated formation energies of dilute Cd impurities are included for  $\text{CuInSe}_2$  (b) and  $\text{CuGaSe}_2$  (c), shown for conditions representing the regimes of Cu-poor and III-rich/Se-poor and Se-rich/III-poor limits, as highlighted in (a). The Fermi level that would result from self-compensation from Cd incorporation is included as the dashed lines in (b) and (c). In contrast the sulfides, these Fermi level values are nearly identical for  $\text{CuInSe}_2$  and  $\text{CuGaSe}_2$ , indicating little sensitivity to the Cd-related Fermi-level pinning values to the GGI in CIGSe alloys.



**Table S5. Summary of formation enthalpies (eV/formula unit) for phases considered in the construction of the calculated phase diagrams in the main text. Chemical potentials ( $\mu_i$ ) of the parent compounds (elemental Cu, Ga, In, Se, S and Cd) were defined relative to the energy per atom in their bulk elemental phases.<sup>1,2</sup>**

| Alloy   | Formation enthalpy (eV/formula unit) | Alloy    | Formation enthalpy (eV/formula unit) | Alloy    | Formation enthalpy (eV/formula unit) |
|---------|--------------------------------------|----------|--------------------------------------|----------|--------------------------------------|
| CuInS2  | -2.541                               | CuInSe2  | -2.483                               | CuIn3Se5 | -5.302                               |
| CuGaS2  | -3.028                               | CuGaSe2  | -2.712                               | CuIn3S5  | -5.526                               |
| CuIn5S8 | -9.234                               | CuIn5Se8 | -8.836                               | CuGa3Se5 | -6.019                               |
| CuGa5S8 | -11.073                              | CuGa5Se8 | -9.833                               | CuGa3S5  | -6.884                               |
| CuSe    | -0.53                                | Cu2Se    | -0.68                                | Cu3Se2   | -1.12                                |
| CuS2    | -0.152                               | CuS      | -0.535                               | Cu2S     | -0.994                               |
| In2S3   | -3.3                                 | In2Se3   | -3.25                                |          |                                      |
| Ga2S3   | -3.952                               | Ga2Se3   | -3.62                                |          |                                      |
| InS     | -1.189                               | InSe     | -1.28                                |          |                                      |
| GaS     | -1.526                               | GaSe     | -1.47                                |          |                                      |

## References

<sup>1</sup> Pohl, J. & Albe, K. Intrinsic point defects in CuInSe2 and CuGaSe2 as seen via screened-exchange hybrid density functional theory. *Phys Rev B* 87, 245203 (2013).

<sup>2</sup> Jain, A., Ong, S. P., Hautier, G., Chen, W., Richards, W. D., Dacek, S., Cholia, S., Gunter, D., Skinner, D., Ceder, G. & Persson, K. A. Commentary: The Materials Project: A materials genome approach to accelerating materials innovation. *Apl Mater* 1, 011002 (2013).
